# Supplementary material
Source: publisher figshare collection journal article supplement (https://gsajournals.figshare.com/articles/dataset/_/13187504)
Supplement: Supplementary file 1 [file 1]

FILE S1.

**Procedure:**

**Step 1 - Annealing of the linker.**

*Oligo sequences (from Picelli et al. 2014):*

FC121-1030 5'-TCGTCGGCAGCGTCAGATGTGTATAAGAGACAG-3'

FC121-1031 5'-GTCTCGTGGGCTCGGAGA TGTGTATAAGAGACAG-3'

Tn5MERev 5'-[phos]CTGTCTCTTATACACATCT-3'

1 Resuspend lyophilized oligos at 100uM in annealing buffer

2 Combine fwd and rev linkers 1:1 (FC121-1030 + Tn5MERev and FC121-1031 + Tn5MERev)

3 Anneal in thermocycler:

| Cycle step     | Temperature (°C) | Time    |
|----------------|------------------|---------|
| Denaturation   | 95               | 5 min   |
| Cooling ramp 1 | 95 down to 65    | 0.1°C/s |
| Incubation     | 65               | 5 min   |
| Cooling ramp 2 | 65 down to 4     | 0.1°C/s |

*store annealed linker in small aliquots of 5-10ul at -20°C*

**Side note - Tn5 linker complex assembly for optimized activity.**

Example for mixing of Tn5 and linkers:

2.0 µl Tn5 protein (0.5 mg/ml – 9.36 µM)

0.5 µl linker A (1030-Tn5MERev annealed oligo)

0.5 µl linker B (1031-Tn5MERev annealed oligo)

8.0 µl Buffer A

11 µl total volume

*Note: this is already a 5.5x dilution of the Tn5 protein.*

*Final buffer composition (approx.)*

*Storage buffer of Tn5 (20 mM Tris pH 7.4, 800 mM NaCl, 50% Glycerol)*

*Salt and Glycerol were diluted 5.5 times (2 µl in total volume of 11 µl)*

*Final Buffer:*

*20 mM Tris pH 7.4*

*145 mM NaCl*

*9 % Glycerol*

*This buffer favors the complex formation between the Tn5 and linkers, as high salt concentration (800 mM NaCl) will inhibit interaction between Tn5 and linkers.*

*Further dilutions of the Tn5 are made with **Buffer B**, which is similar in composition to the buffer in which the Tn5-linker complexes are assembled. Final Tn5 dilutions of 1:10 to 1:50 work well. We recommend testing a dilution series for your application of interest to identify the preferred fragment size spectrum.*

**Calculations:**

2.0 µl of Tn5 (0.5 mg/ml) - 9.36 µM = 18.72 pmol

1 µl of linker mix - 50 µM = 50 pmol

**Ratio:**

Tn5:linkers = 1 : 2.67

**Comment:**

*This ratio favors all Tn5 dimer molecules to be occupied by two linkers. Providing a slight excess of the linkers shifts the equilibrium to the fully saturated Tn5-linker complex.*

**Step 2 - Tn5 loading.**

*Thaw annealed linker on ice!*

*Avoid freeze-thaw cycles of Tn5 (aliquot stocks)*

- 1) Add 0.5 ul of each linker (from above) to 2 ul Tn5 (0.5 mg/ml) stock and 8ul of Buffer A
- 2) Mix well and incubate at 23°C for 30 – 60 min at 300 rpm (thermomixer)
- 3) Dilute the Tn5 in Buffer B to the final desired dilution

*Tn5 is ready to use!*

*If ideal dilution for desired fragment size is not known, make different final dilutions of Tn5 (e.g 1:10, 1:20, 1:50) and run tests for fragment size.*

**Step 3 - Cell wall digestion.**

*Use up to 100ul of saturated overnight culture (between 250,000 and ~2Mio cells final works well)*

- 1) Spin down cells and resuspend in 25 ul 300U/ml Zymolyase (dilute Zymolyase in nuclease-free water)
- 2) Incubate 30 min at 37°C, inactivate 10 min at 95°C

**Step 4 - Tagmentation.**

**Important: pre-heat block to desired temperature and make sure to exactly adhere to the incubation time (put samples on ice immediately after tagmentation).**

*Note: Tagmentation can be done at 37°C or 55°C. Fragment size spectrum can be adjusted by changing incubation temperature, time and the dilution factor of the loaded Tn5.*

Tagmentation mix:

- 1.25 ul zymolyased cells
- 1.25 ul Tn5 dilution
- 2.5 ul tagmentation buffer + 20% DMF

mix well, spin down and incubate in pre-heated thermocycler

incubate 3 min at 55°C

put sample on ice

add 1.25 ul 0.2% SDS immediately

mix well by vortexing, spin down and incubate 5 min at room temperature

**Step 5 Version A - Nucleosome release via Proteinase K.**

1.75 ul 0.4 mg/ml Proteinase K

6.25 ul tagmented cells

incubate 30 min at 50°C, 15 min at 65°C

*optional pause point: protocol can be stopped here and samples frozen at -20C*

**Step 5 Version B - Nucleosome release via salt.**

3.75 ul 3M NaOAc

6.25 ul tagmented cells

incubate 60 min at room temperature.

**Step 6 - 1.8X AMPure beads cleanup** (5 min incubation of sample with beads at room temperature, two washes with 70% ethanol), elute in 6.25 ul nuclease-free water

**Step 7 - PCR.**

The oligos used in the PCR contain the sequencing adapter (grafting primer and index barcode)

1) Mix:

- 6.25 ul sample
- 6.75 ul 2x KAPA HiFi mix
- 0.75 ul DMSO
- 1.25 ul Index primer 1
- 1.25 ul Index primer 2

PCR program:

|      |       |             |
|------|-------|-------------|
| 72°C | 3 min |             |
| 95°C | 30 s  |             |
| 95°C | 10 s  |             |
| 55°C | 30 s  | x 12 cycles |
| 72°C | 60 s  |             |
| 72°C | 5 min |             |
| 10°C | hold  |             |

**Step 8 - clean up** with 0.8x AmPure beads (to filter out small fragments), or 1.8x (recover everything), elute in 10 ul EB or nuclease-free water

**Step 9 - QC** dsDNA HS Qubit measurement and Bioanalyzer (Qubit yield should be minimum 1 ng/ul when starting from 100 ul saturated culture)

**Buffers:**

**Annealing buffer:**

- 40mM Tris pH 8
- 50mM NaCl

**Buffer A:**

- 20 mM Tris pH 7.5

**Buffer B:**

- 20 mM Tris pH 7.5
- 150 mM NaCl

**Tagmentation buffer 2 (TB2, 100ml, in H<sub>2</sub>O, store at room temperature):**

- 2ml 1M Tris (final 16 mM)
- 1ml 1M MgCl<sub>2</sub> (final 8 mM)
- adjust pH to 7.6 with 100% acetic acid
- Always fresh: add 20% (v/v) DMF
