# Supplementary material
Source: publisher figshare collection journal article supplement (https://gsajournals.figshare.com/articles/dataset/_/13187504)
Supplement: Supplementary file 1 [file 1]

## Sheet: Sheet1
Table S1. Overview of experimental conditions and associated insert sizes
Sample	Median	Mode	Enzyme	Nucleosome dissociation	Tagmentation buffer	Tagmentation temperature	Enzyme dilution	Beads ratio final cleanup
NXTMP	115	70	Nextera	extracted	Nextera	55°C	none	1.8X
Nextera NA	129	54	Nextera	NA	Nextera	55°C	none	1.8X
Nextera ProK	150	96	Nextera	ProK 65°C	Nextera	55°C	none	1.8X
Tn5R27S,E54K,L372P NA	151	97	Tn5R27S,E54K,L372P	NA	TB1	55°C	1:10	1.8X
Tn5R27S,E54K,L372P ProK	182	139	Tn5R27S,E54K,L372P	ProK 65°C	TB1	55°C	1:10	1.8X
Tn5R27S,E54K,L372P Salt	118	75	Tn5R27S,E54K,L372P	salt	TB1	55°C	1:10	1.8X
Tn5R27S,E54K,L372P ProK 50C65C	178	128	Tn5R27S,E54K,L372P	ProK 50°C/65°C	TB1	55°C	1:10	1.8X
Tn5R27S,E54K,L372P ProK 50C	100	65	Tn5R27S,E54K,L372P	ProK 50°C	TB1	55°C	1:10	1.8X
Tn5R27S,E54K,L372P ProK 65C	180	138	Tn5R27S,E54K,L372P	ProK 65°C	TB1	55°C	1:10	1.8X
Tn5R27S,E54K,L372P ProK TB1	203	145	Tn5R27S,E54K,L372P	ProK 50°C/65°C	TB1	55°C	1:10	0.8X
Tn5R27S,E54K,L372P ProK TB2	158	112	Tn5R27S,E54K,L372P	ProK 50°C/65°C	TB2	55°C	1:10	0.8X
Tn5E54K,L372P ProK TB1	213	183	Tn5E54K,L372P	ProK 50°C/65°C	TB1	55°C	1:10	0.8X
Tn5E54K,L372P ProK TB2	194	167	Tn5E54K,L372P	ProK 50°C/65°C	TB2	55°C	1:10	0.8X
Tn5R27S,E54K,L372P ProK TB2 1:10 37C	192	149	Tn5R27S,E54K,L372P	ProK 50°C/65°C	TB2	37°C	1:10	0.8X
Tn5R27S,E54K,L372P ProK TB2 1:50 55C	211	186	Tn5R27S,E54K,L372P	ProK 50°C/65°C	TB2	55°C	1:50	0.8X
